# Supplementary material
Source: PubMed Central journal article supplement (PMC3807260)
Supplement: hdy201350x3.pdf [file hdy201350x3.pdf]

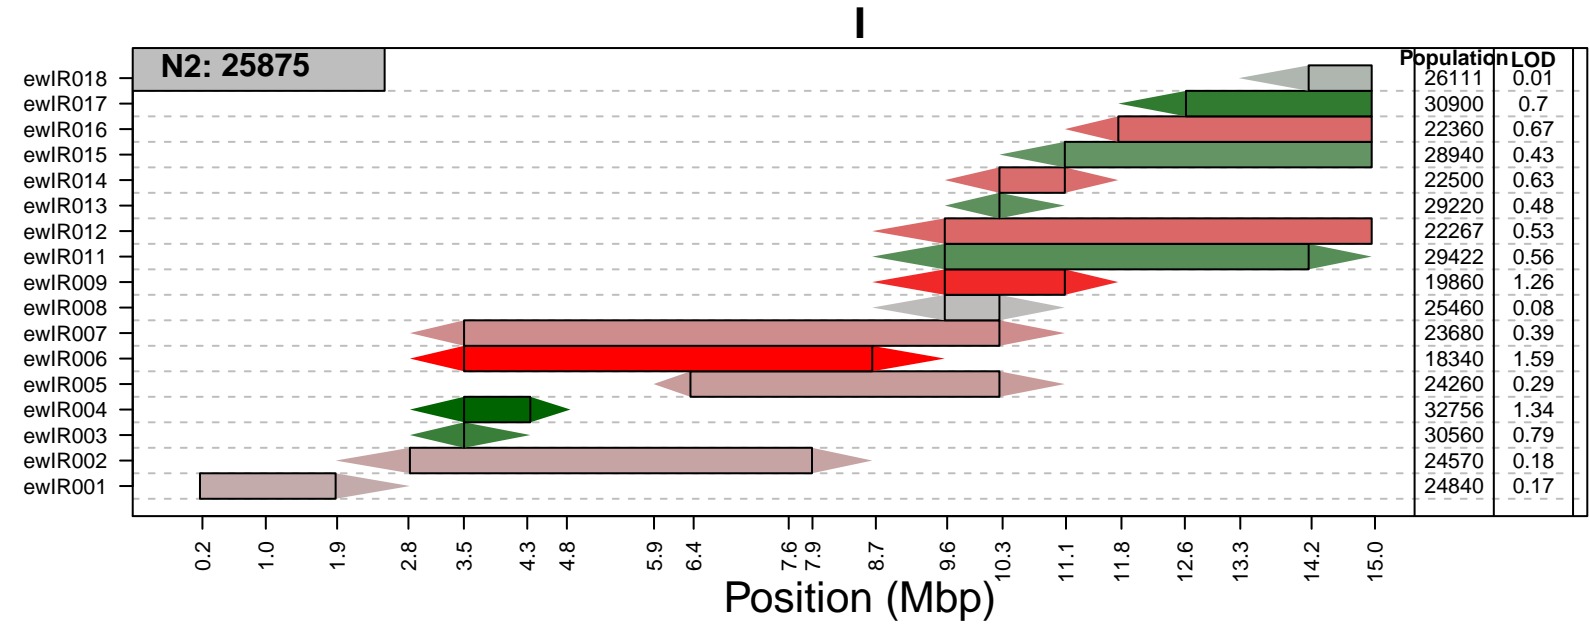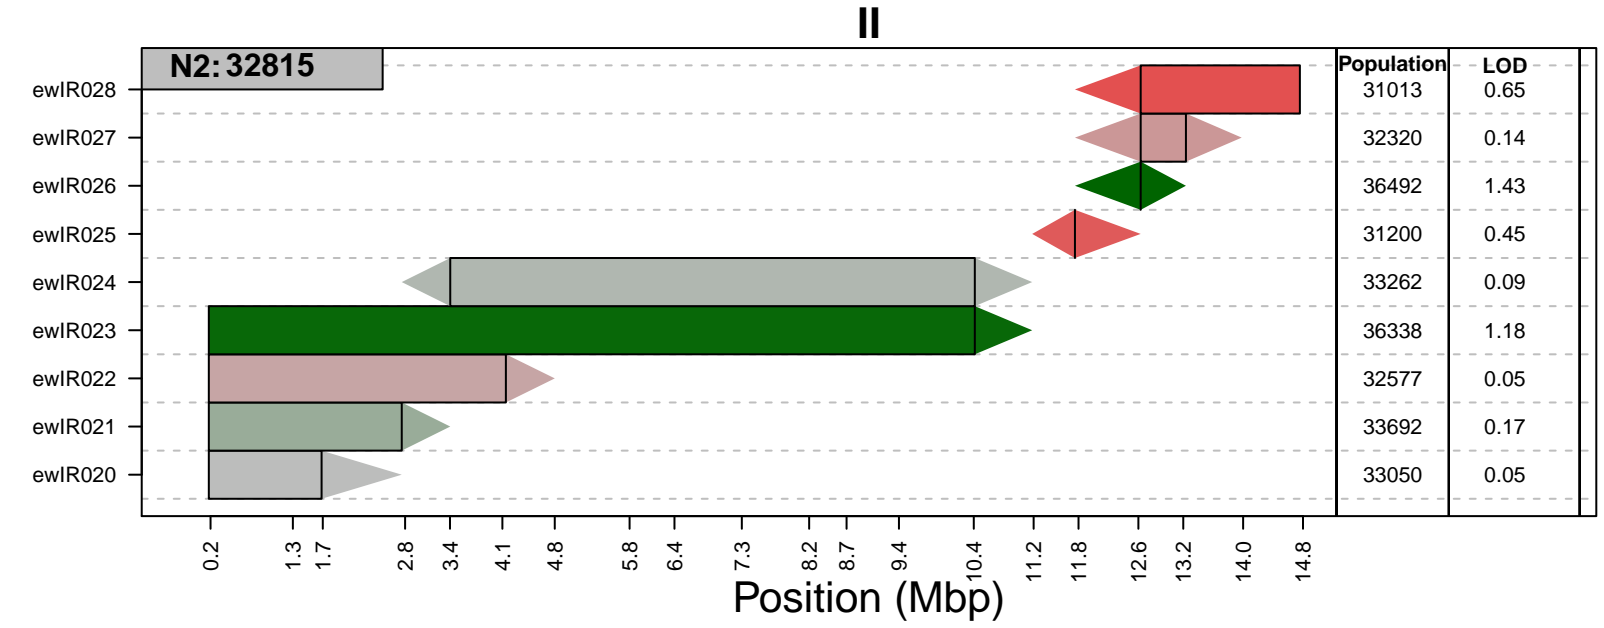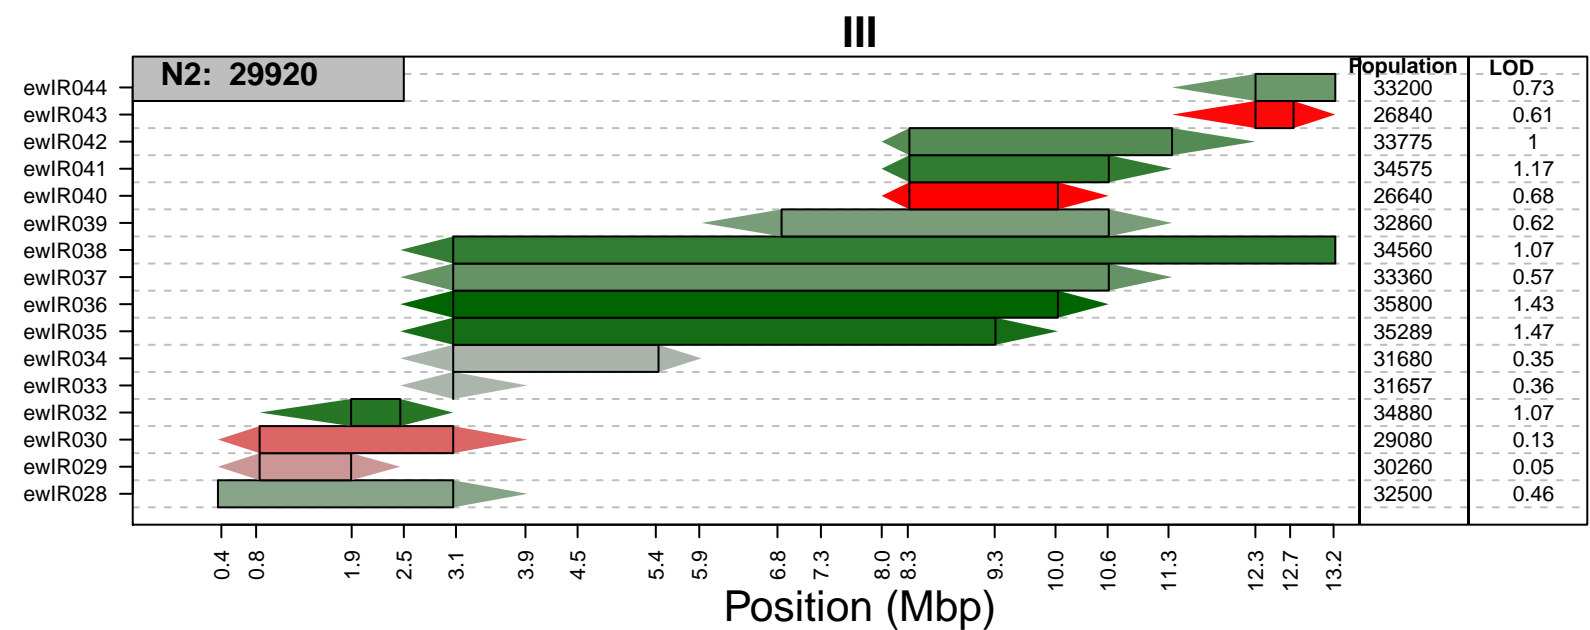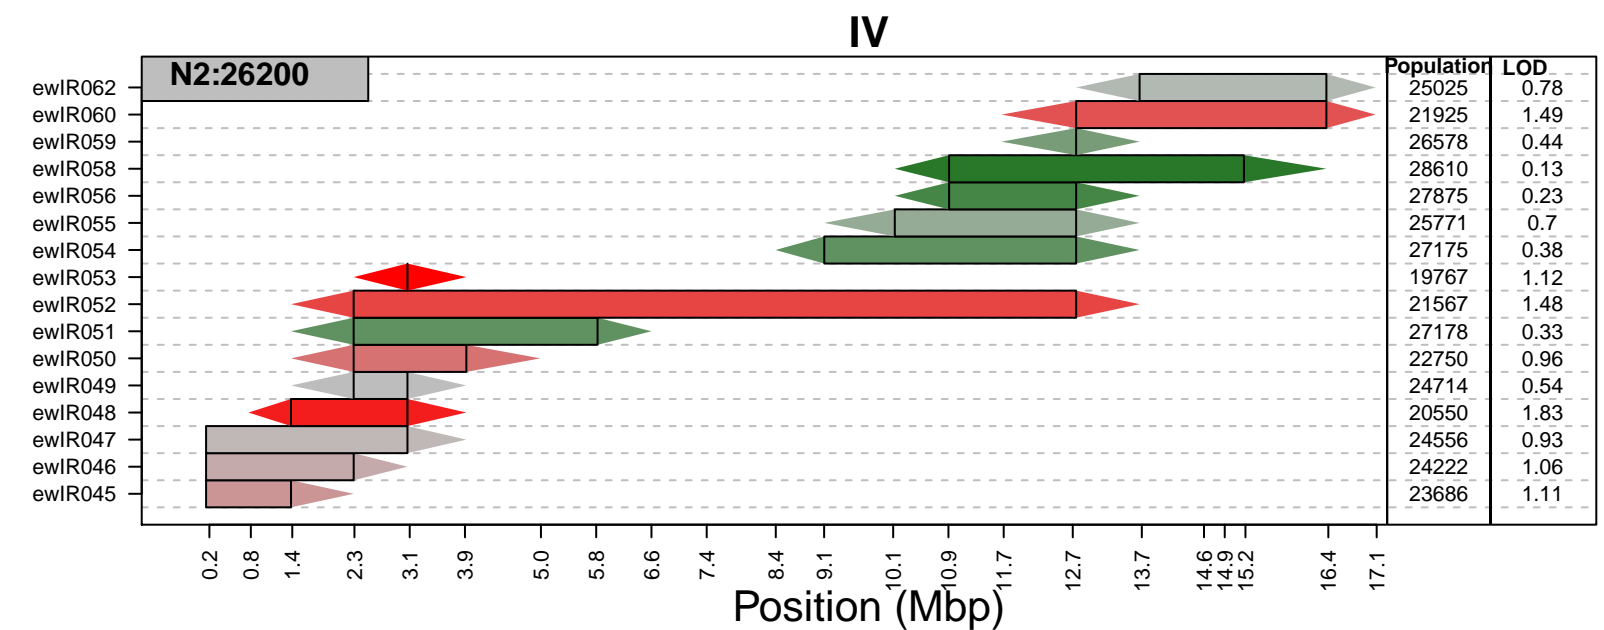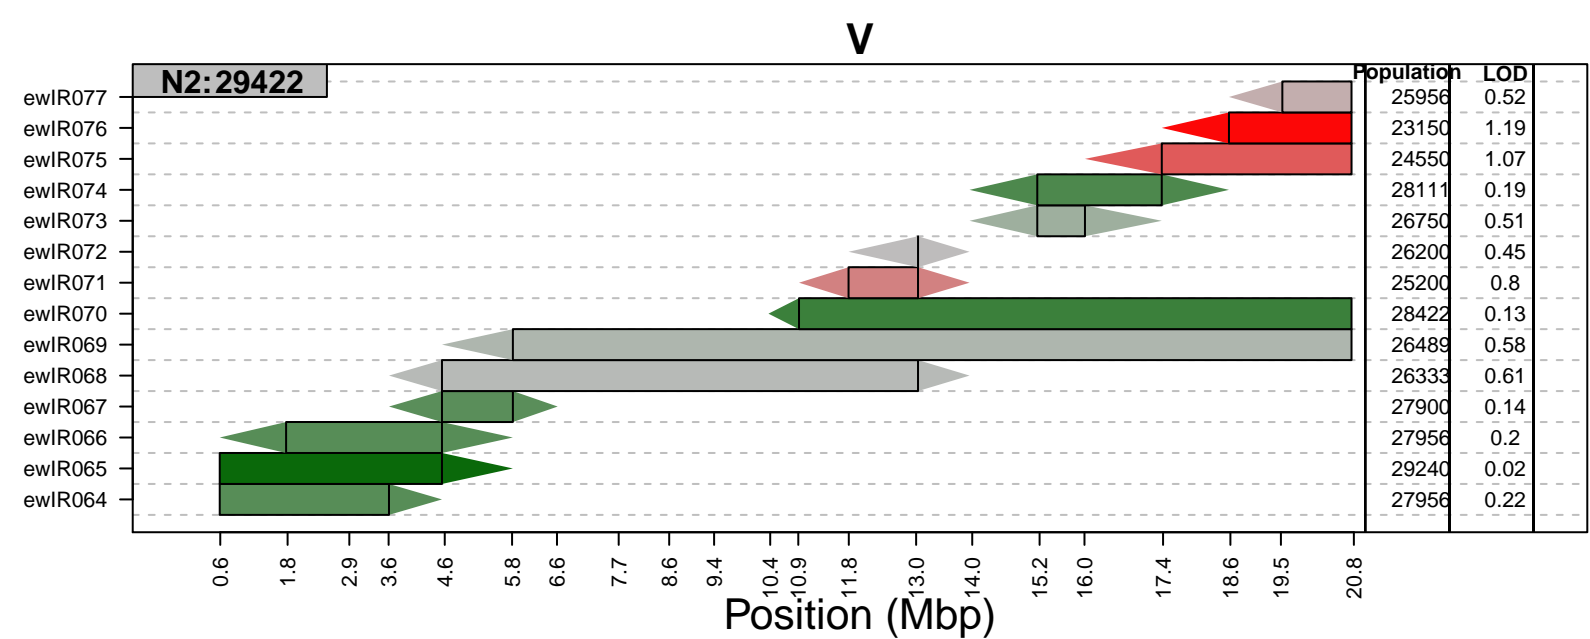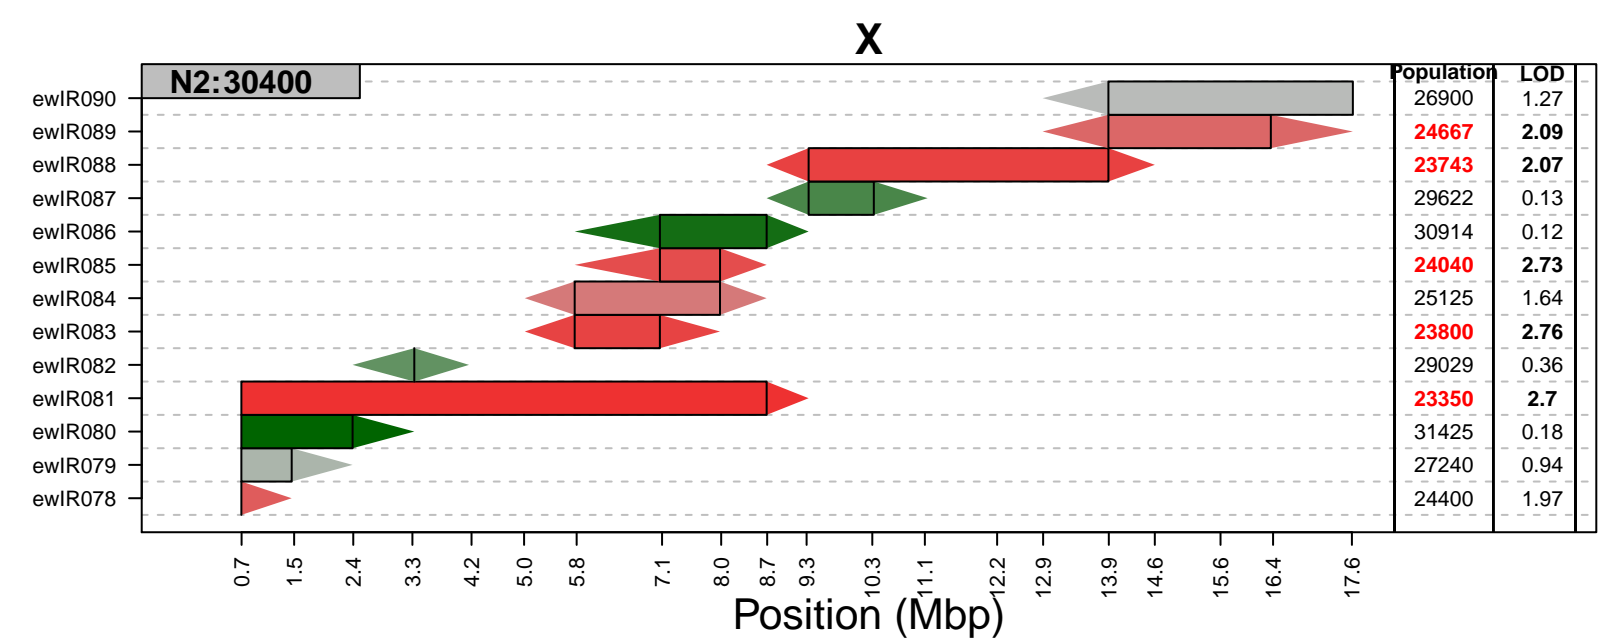

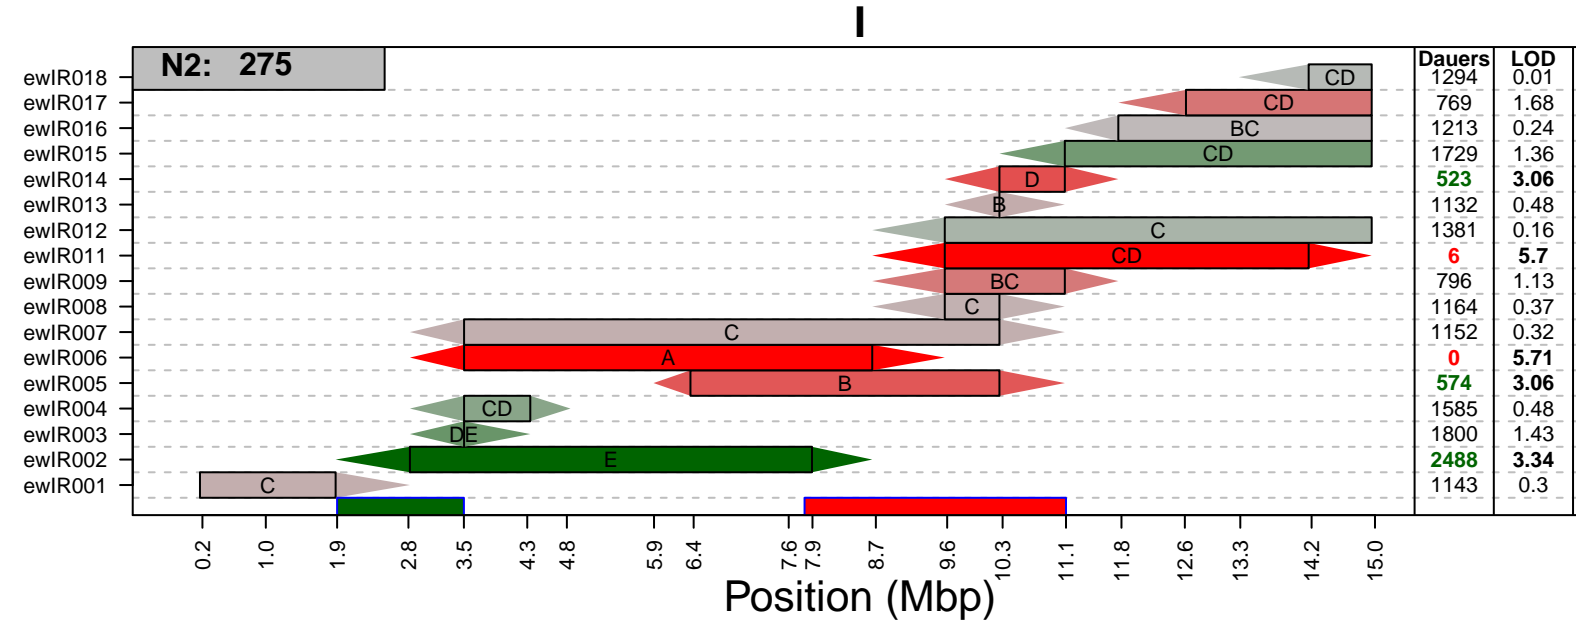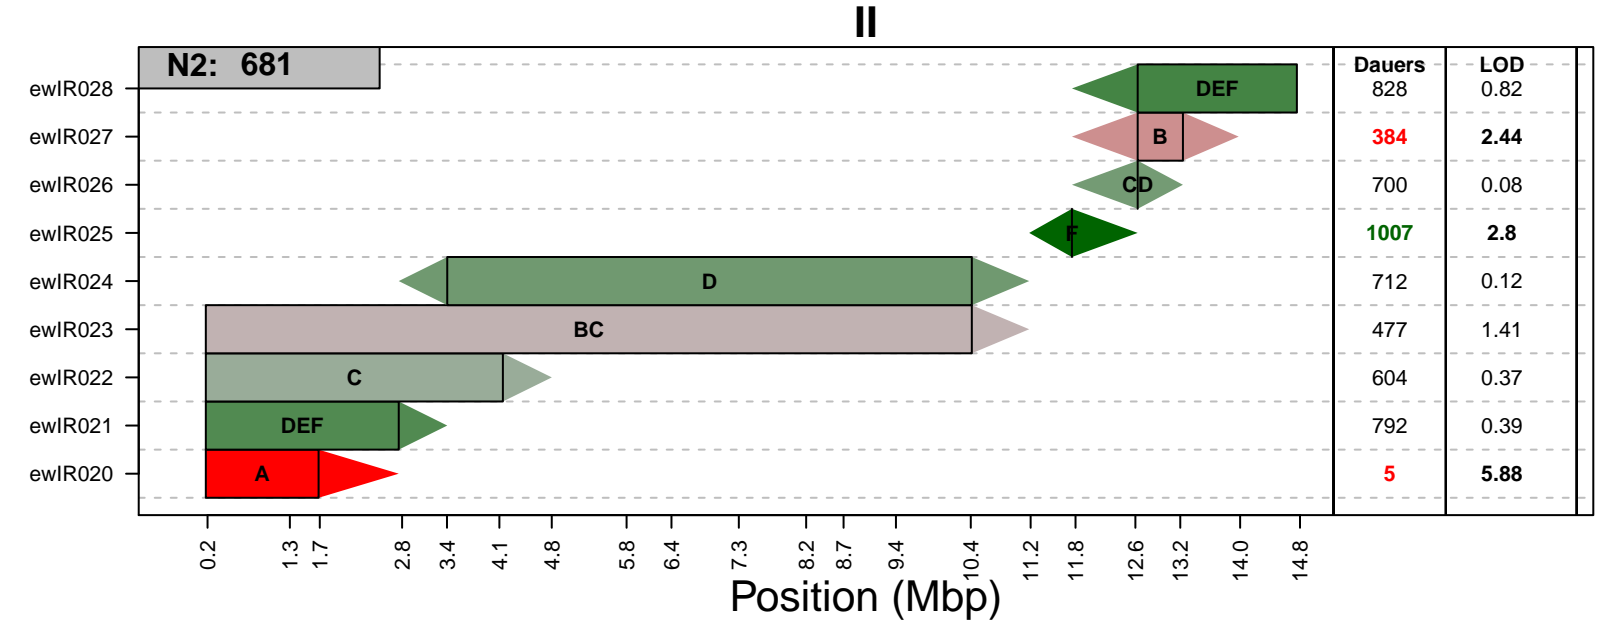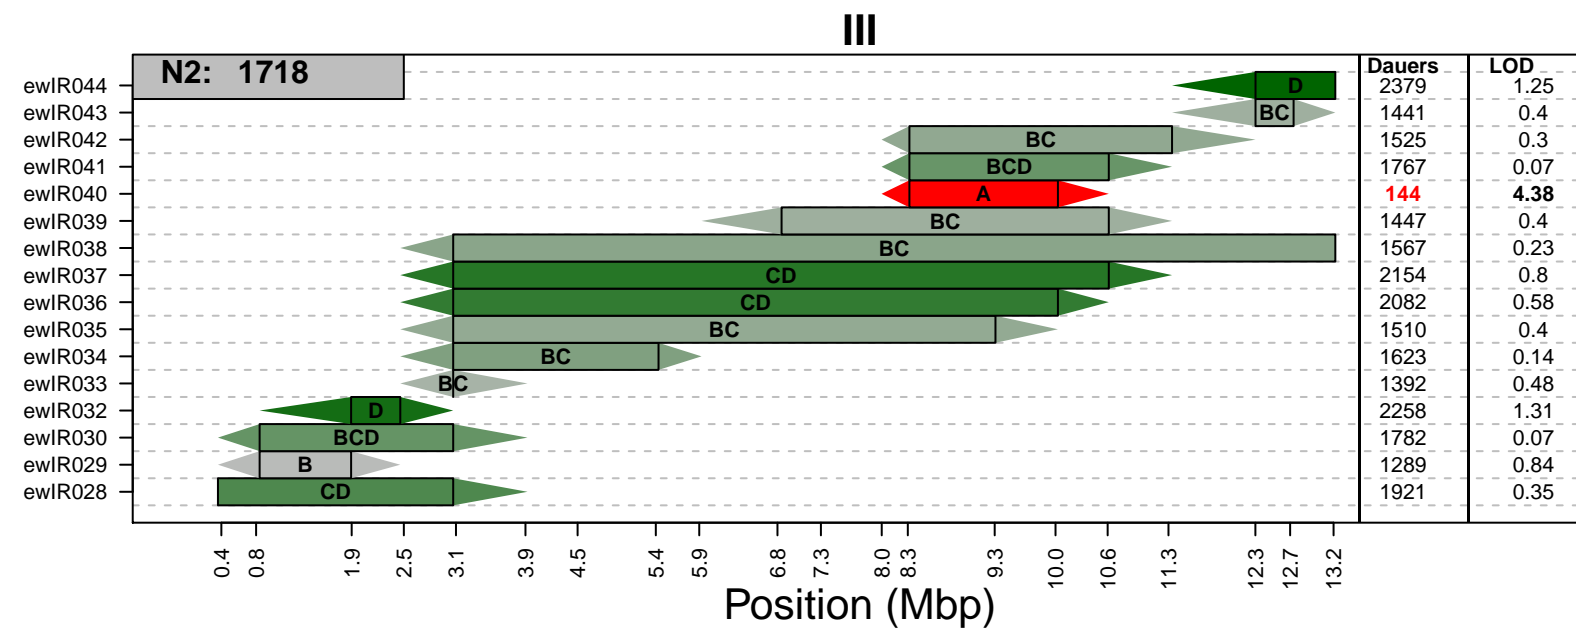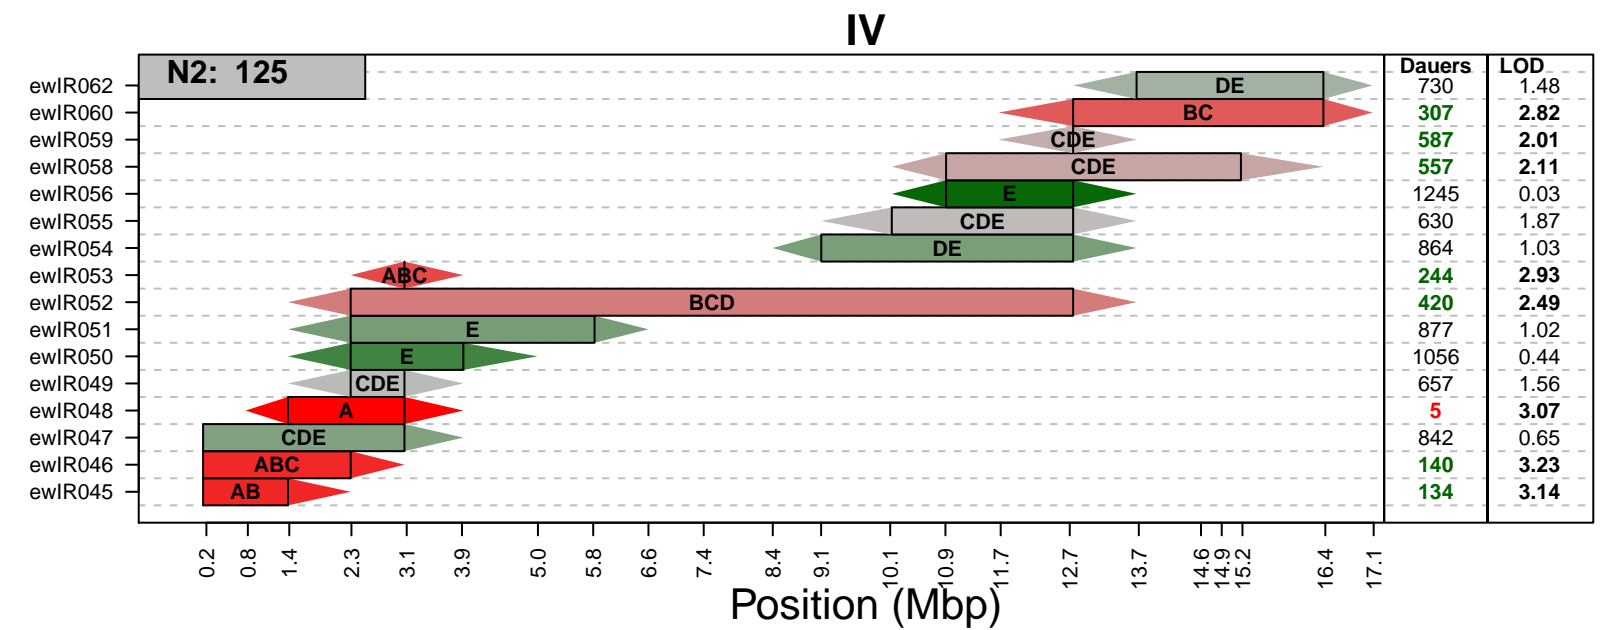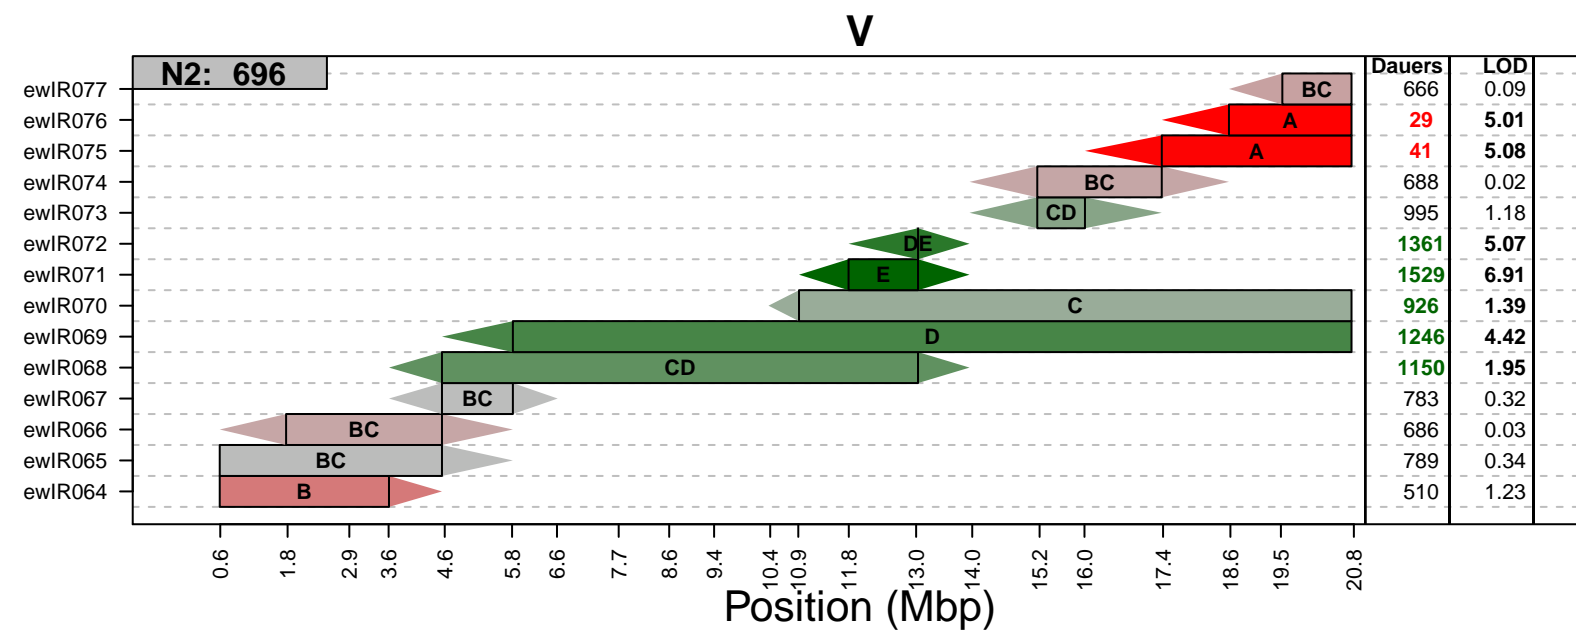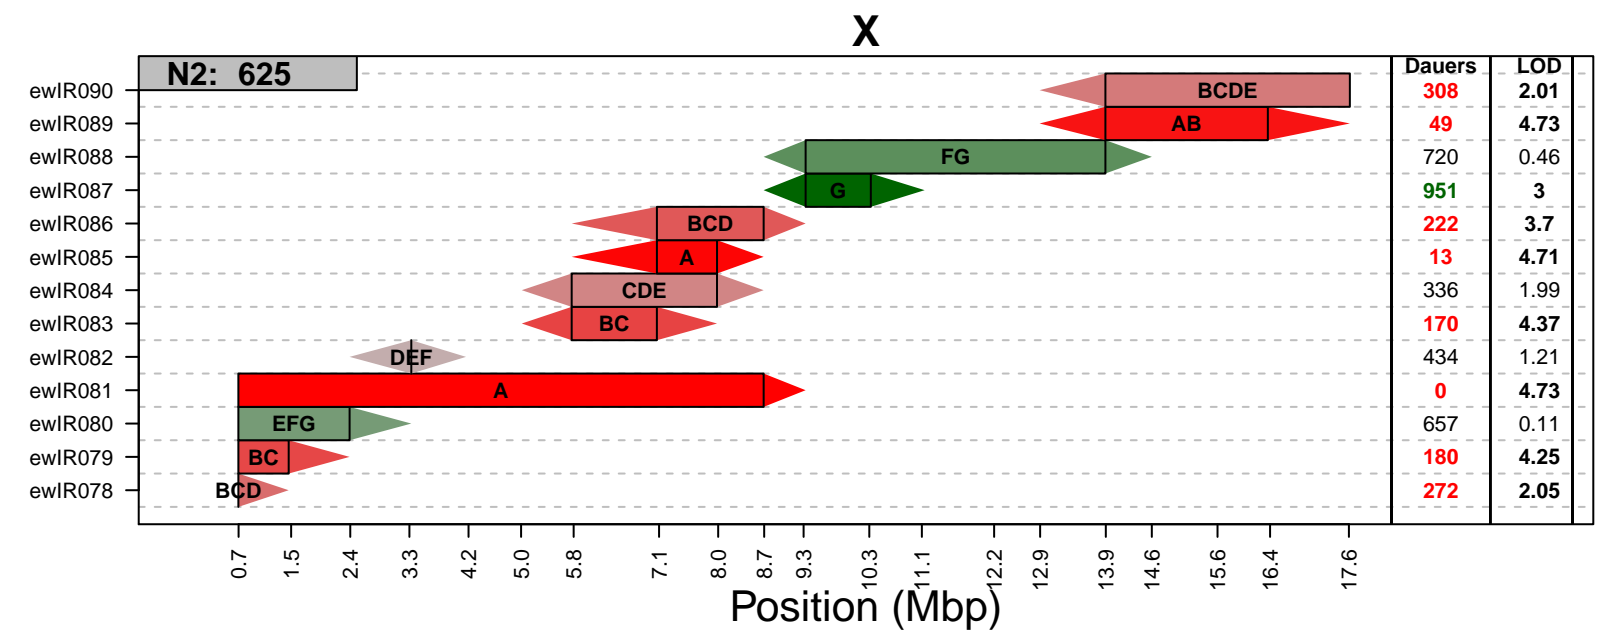

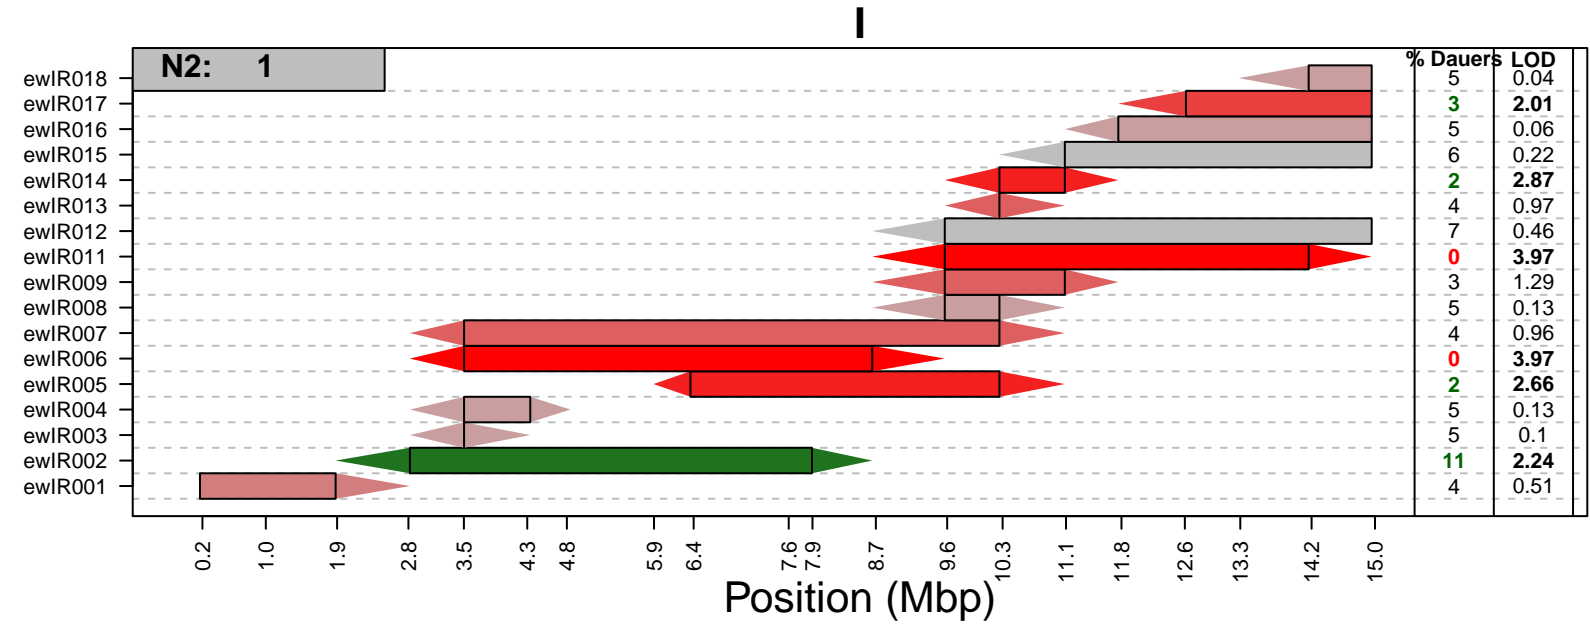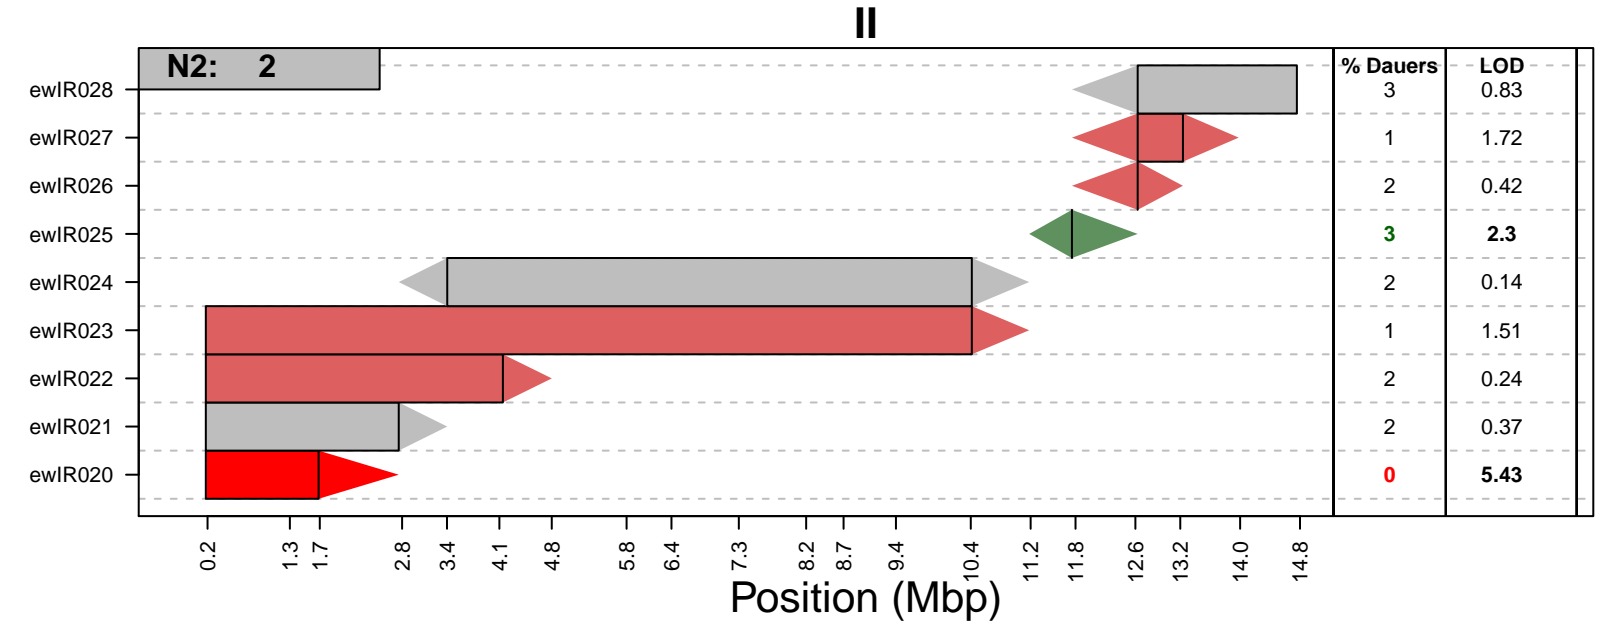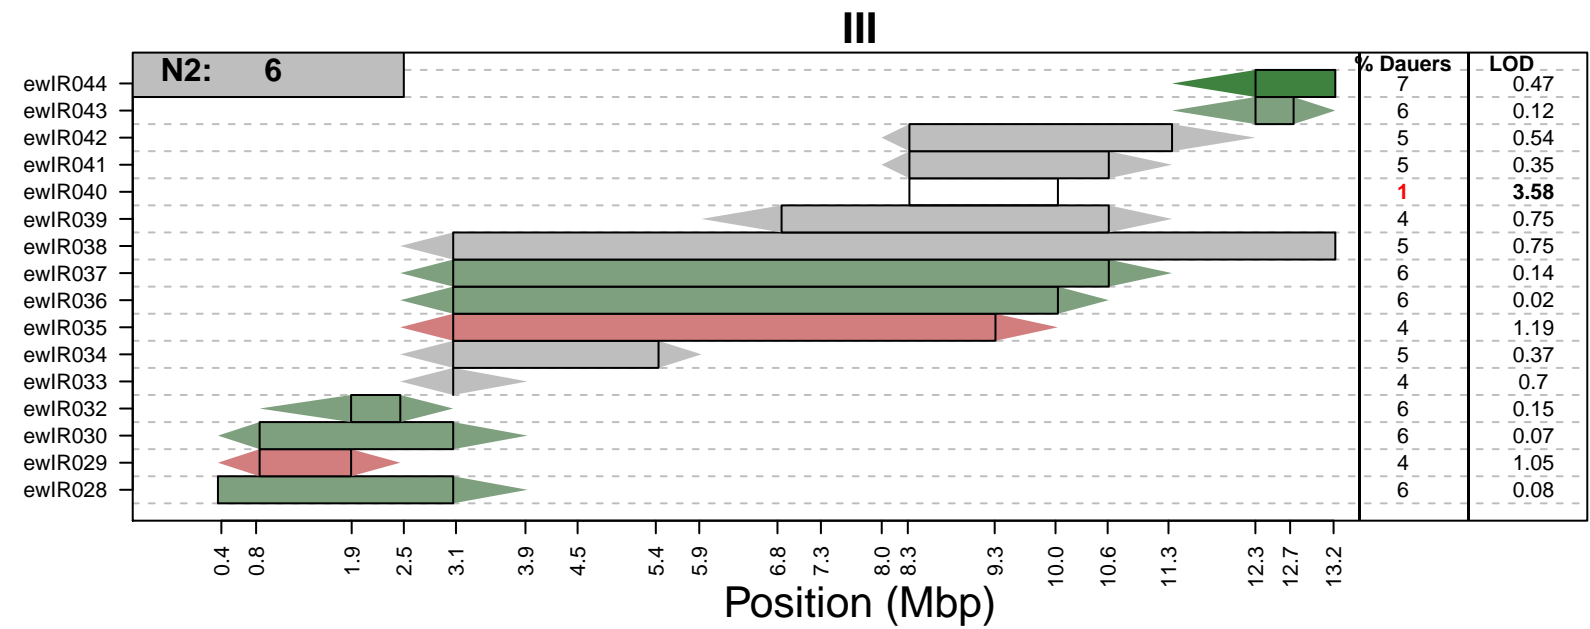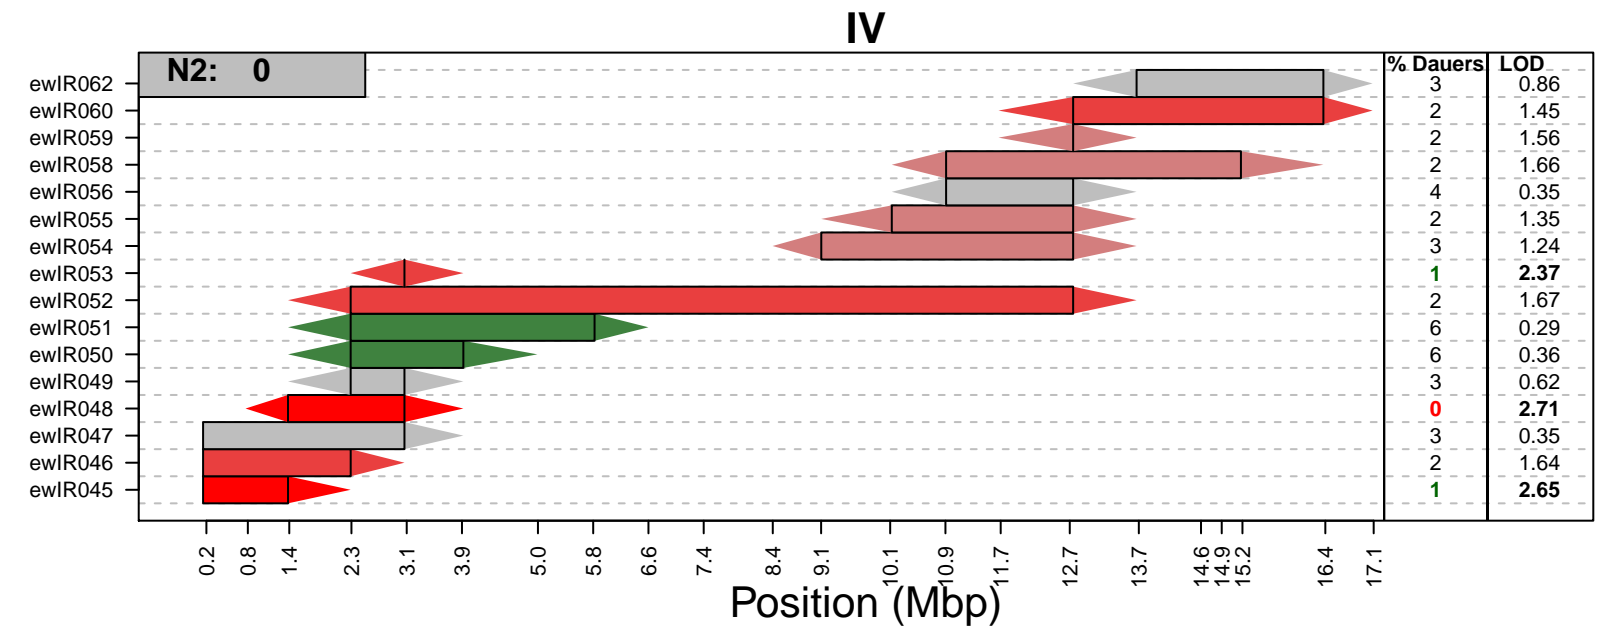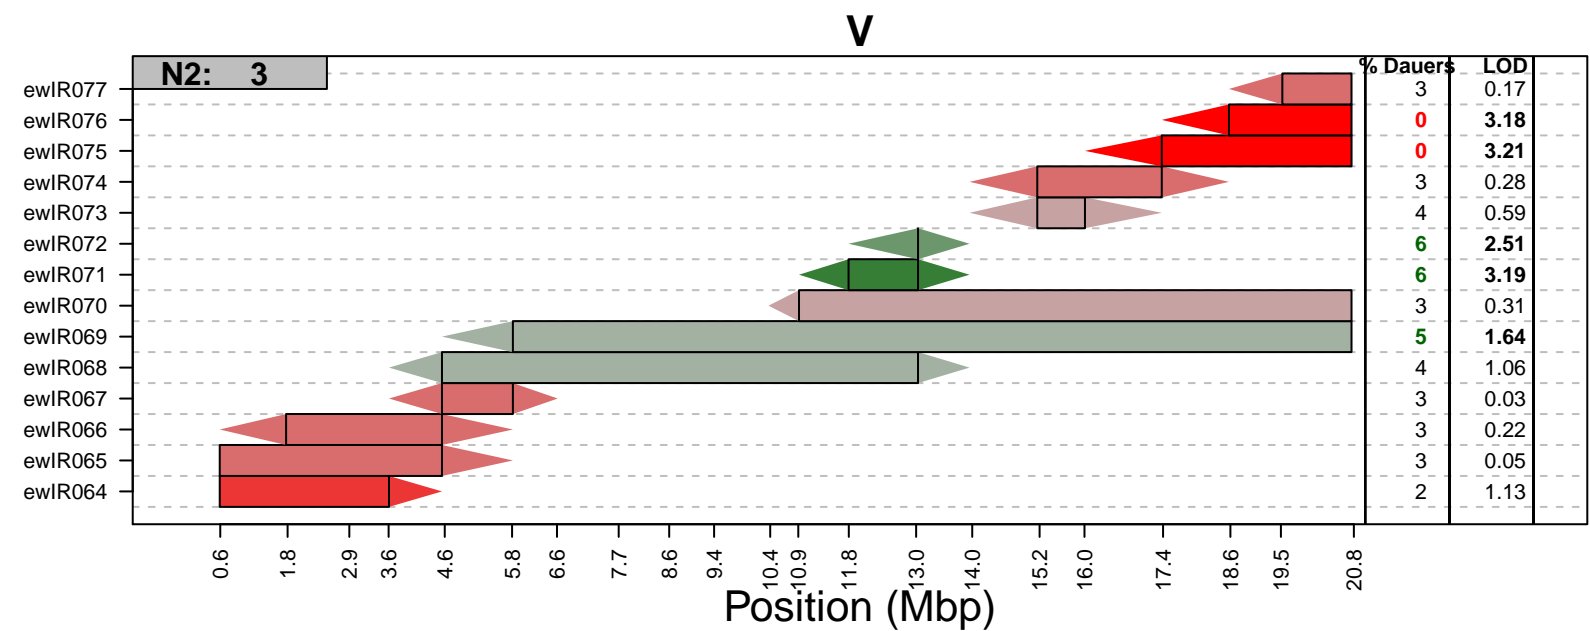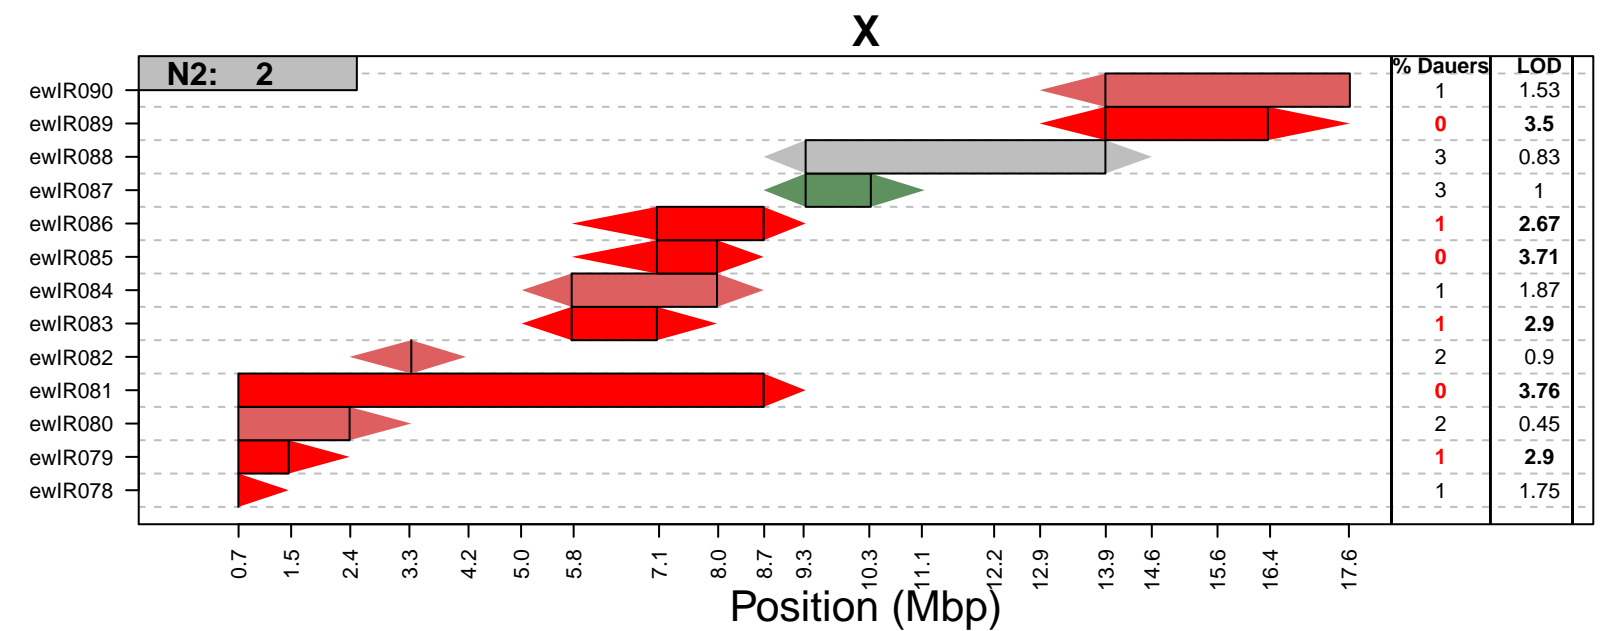

Supplemental Figure 9: ILs of all chromosomes for population size (page 1), dauer larvae number (page 2) and % dauer larvae (page 3). The CB4856 introgression per IL is shown by the coloured rectangle. The locus between two bordering markers is indicated by a triangle. The colours indicate the difference with the mean of the whole set of lines, green more dauer larvae, red less dauer larvae. The letters in the introgression box indicate to which of the five significantly different groups an IL belongs. IL names on the right y-axis. N2 dauer larvae number in the grey box in the upper right corner. On the left side the number of dauer larvae is shown, red if significantly lower than N2 and green if significantly higher. Also the significance in  $-10\log(p)$  is shown in the column "LOD". QTLs are indicated at the x-axis by the green box (positive CB4856) and the red box (negative CB4856).
