# Supplementary material
Source: PubMed Central journal article supplement (PMC3807260)
Supplement: hdy201350x4.pdf [file hdy201350x4.pdf]

Supplemental Table 1: Thresholds,  $-\log_{10}(p)$  threshold at a 0.05 FDR, for bin mapping the total number of dauer larvae, the population size and the percentage of dauer larvae.

| Chromosome | Total number of dauer larvae | Population size | % dauer larvae |
|------------|------------------------------|-----------------|----------------|
| I          | 2.67                         | 2.67            | 2.62           |
| II         | 2.56                         | 2.63            | 2.58           |
| III        | 2.57                         | 2.61            | 2.50           |
| IV         | 2.89                         | 2.59            | 2.66           |
| V          | 2.94                         | 2.86            | 3.02           |
| X          | 2.80                         | 2.61            | 2.65           |

Supplemental Table 2: Thresholds for the different mapping methods for total number of dauer larvae per chromosome.

| Chromosome | BIN mapping $-\log_{10}(p)$ threshold at a 0.05 FDR | Single IL analysis threshold at a 0.05 Bonferroni correction ( $p$ ) | Sequential IL analysis threshold at a 0.05 Bonferroni correction ( $p$ ) |
|------------|-----------------------------------------------------|----------------------------------------------------------------------|--------------------------------------------------------------------------|
| I          | 2.67                                                | 0.003                                                                | 0.002                                                                    |
| II         | 2.56                                                | 0.006                                                                | 0.005                                                                    |
| III        | 2.57                                                | 0.003                                                                | 0.002                                                                    |
| IV         | 2.89                                                | 0.003                                                                | 0.002                                                                    |
| V          | 2.94                                                | 0.004                                                                | 0.003                                                                    |
| X          | 2.80                                                | 0.004                                                                | 0.003                                                                    |

Supplemental Table 3: Locations and effect of QTLs detected for the population size and the percentage of dauer larvae by analysis of individual ILs and by BIN mapping the ILs. Limits denote the maximum possible QTL region. ILs supporting the QTL are indicated in the last column, ILs in parentheses show the effect but don't meet the significance threshold.

| Trait           | Chr. | Limits (Mbp) | CB4856 effect | IL support | BIN support | ILs                  |
|-----------------|------|--------------|---------------|------------|-------------|----------------------|
| Population size | X    | 0-1.5        | -             | X          |             | 078                  |
|                 | X    | 4.2-5.8      | -             | X          |             | 081                  |
|                 | X    | 5.8-8.0      | -             | X          |             | 081, 083, 084, 085   |
|                 | X    | 12.9-14.6    | -             | X          |             | 088, 089, (090)      |
| Percent dauer   | I    | 1.9-3.5      | +             | X          |             | 002                  |
|                 | I    | 7.9-9.6      | -             | X          | X           | 005, 006             |
|                 | I    | 9.6-11.1     | -             | X          |             | 013                  |
|                 | I    | 11.1-15.0    | -             | X          |             | 016                  |
|                 | II   | 0-2.8        | -             | X          |             | 020                  |
|                 | II   | 11.2-13.2    | +             | X          |             | 025                  |
|                 | III  | 0-3.1        | -             |            | X           |                      |
|                 | III  | 8.0-10.6     | -             | X          |             | 040                  |
|                 | IV   | 0.8-2.3      | -             | X          |             | 045, 048, (046)      |
|                 | IV   | 2.3-3.9      | -             | X          |             | 053, (052)           |
|                 | IV   | 12.7-16.4    | -             | (X)        | X           | (058, 059, 060)      |
|                 | V    | 11.8-14.0    | +             | X          |             | 069, 071, 073        |
|                 | V    | 17.4-19.5    | -             | X          |             | 075, 076             |
|                 | X    | 0-2.4        | -             | X          | X           | 078, 079, 081        |
|                 | X    | 5.8-8.0      | -             | X          | X           | 083, 085, 086, (084) |
|                 | X    | 12.9-17.6    | +             | X          | X           | 089, (090)           |

Supplemental Table 4: QTLs identified by pairwise IL mapping. QTLs in bold meet both genome-wide and chromosome thresholds, QTLs in normal font meet chromosome threshold, and QTLs in italics are significant as single tests. For all QTLs, the effect size of the CB4856 allele is noted and the support for the QTL in the IL and BIN mapping is noted.

| CHR        | Left N2 marker | Limits (Mbp)     | Right N2 marker | <i>p</i>        | CB effect | Effect Size (CB4856) | ILs          | CHR thresh. | GW thresh. | IL support | BIN support |
|------------|----------------|------------------|-----------------|-----------------|-----------|----------------------|--------------|-------------|------------|------------|-------------|
| <b>I</b>   | <b>1.9</b>     | <b>2.8-7.9</b>   | <b>8.7</b>      | <b>2.00E-04</b> | <b>P</b>  | <b>591</b>           | <b>N2,02</b> | <b>X</b>    | <b>X</b>   | <b>X</b>   | <b>X</b>    |
| <b>I</b>   |                | <b>4.3-8.7</b>   | <b>9.6</b>      | <b>5.00E-06</b> | <b>N</b>  | <b>-792</b>          | <b>04,06</b> | <b>X</b>    | <b>X</b>   | <b>X</b>   | <b>X</b>    |
| <i>I</i>   | <i>5.9</i>     | <i>6.4-8.7</i>   |                 | <i>5.00E-03</i> | <i>P</i>  | <i>320</i>           | <i>13,08</i> |             |            |            |             |
| <b>I</b>   |                | <b>8.7-10.3</b>  | <b>11.1</b>     | <b>2.00E-06</b> | <b>P</b>  | <b>576</b>           | <b>06,07</b> | <b>X</b>    | <b>X</b>   |            |             |
| <i>I</i>   | <i>8.7</i>     | <i>9.6-10.3</i>  |                 | <i>4.00E-03</i> | <i>N</i>  | <i>-466</i>          | <i>14,09</i> |             |            |            |             |
| <i>I</i>   | <i>9.6</i>     | <i>10.3-10.3</i> | <i>11.1</i>     | <i>7.00E-04</i> | <i>N</i>  | <i>-391</i>          | <i>N2;13</i> | <i>X</i>    |            | <i>X</i>   |             |
| <b>I</b>   |                | <b>10.3-11.1</b> | <b>11.8</b>     | <b>3.00E-05</b> | <b>P</b>  | <b>603</b>           | <b>13,14</b> | <b>X</b>    | <b>X</b>   |            |             |
| <b>II</b>  |                | <b>0-1.7</b>     | <b>2.8</b>      | <b>7.00E-08</b> | <b>N</b>  | <b>-336</b>          | <b>N2,19</b> | <b>X</b>    | <b>X</b>   | <b>X</b>   |             |
| <i>II</i>  |                | <i>0-2.8</i>     | <i>3.4</i>      | <i>3.00E-03</i> | <i>N</i>  | <i>-117</i>          | <i>23,22</i> | <i>X</i>    |            |            |             |
| <b>II</b>  |                | <b>1.7-2.8</b>   | <b>3.4</b>      | <b>4.00E-07</b> | <b>P</b>  | <b>392</b>           | <b>19,20</b> | <b>X</b>    | <b>X</b>   |            |             |
| <i>II</i>  | <i>11.2</i>    | <i>11.8-11.8</i> | <i>12.6</i>     | <i>7.00E-03</i> | <i>P</i>  | <i>147</i>           | <i>N2,24</i> |             |            | <i>X</i>   |             |
| <b>II</b>  |                | <b>12.6-13.2</b> | <b>14.0</b>     | <b>2.00E-04</b> | <b>N</b>  | <b>-141</b>          | <b>25,26</b> | <b>X</b>    | <b>X</b>   | <b>X</b>   |             |
| <b>II</b>  | <b>13.2</b>    | <b>14-14.8</b>   |                 | <b>1.00E-06</b> | <b>P</b>  | <b>222</b>           | <b>26,27</b> | <b>X</b>    | <b>X</b>   |            |             |
| <b>III</b> | <b>2.5</b>     | <b>3.1-8.3</b>   |                 | <b>2.00E-06</b> | <b>P</b>  | <b>924</b>           | <b>40,36</b> | <b>X</b>    | <b>X</b>   |            |             |
| <b>III</b> | <b>8.0</b>     | <b>8.3-10</b>    | <b>1.6</b>      | <b>3.00E-05</b> | <b>N</b>  | <b>-742</b>          | <b>N2,40</b> | <b>X</b>    | <b>X</b>   | <b>X</b>   |             |
| <b>III</b> |                | <b>10-10.6</b>   | <b>11.3</b>     | <b>8.00E-07</b> | <b>P</b>  | <b>766</b>           | <b>40,41</b> | <b>X</b>    | <b>X</b>   |            |             |
| <b>IV</b>  |                | <b>0-1.4</b>     | <b>2.3</b>      | <b>2.00E-04</b> | <b>N</b>  | <b>-570</b>          | <b>N2,45</b> | <b>X</b>    | <b>X</b>   | <b>X</b>   | <b>X</b>    |
| <b>IV</b>  | <b>2.3</b>     | <b>3.1-3.1</b>   | <b>3.9</b>      | <b>7.00E-05</b> | <b>N</b>  | <b>-515</b>          | <b>N2,53</b> | <b>X</b>    | <b>X</b>   | <b>X</b>   |             |
| <i>IV</i>  | <i>11.7</i>    | <i>12.7-12.7</i> | <i>13.7</i>     | <i>3.00E-03</i> | <i>N</i>  | <i>-344</i>          | <i>N2,59</i> |             |            | <i>X</i>   | <i>X</i>    |
| <i>V</i>   |                | <i>5.8-13</i>    | <i>14</i>       | <i>3.00E-03</i> | <i>P</i>  | <i>231</i>           | <i>67,69</i> | <i>X</i>    |            |            | <i>X</i>    |
| <b>V</b>   | <b>10.4</b>    | <b>10.9-17.4</b> |                 | <b>1.00E-08</b> | <b>P</b>  | <b>442</b>           | <b>75,70</b> | <b>X</b>    | <b>X</b>   |            | <b>X</b>    |
| <b>V</b>   | <b>11.8</b>    | <b>13-13</b>     | <b>14</b>       | <b>8.00E-06</b> | <b>P</b>  | <b>332</b>           | <b>N2,72</b> | <b>X</b>    | <b>X</b>   | <b>X</b>   | <b>X</b>    |
| <b>V</b>   | <b>17.4</b>    | <b>18.6-19.5</b> |                 | <b>3.00E-04</b> | <b>N</b>  | <b>-318</b>          | <b>77,76</b> | <b>X</b>    | <b>X</b>   |            |             |
| <i>X</i>   |                | <i>0-0.7</i>     | <i>1.5</i>      | <i>8.00E-03</i> | <i>N</i>  | <i>-176</i>          | <i>N2,78</i> |             |            | <i>X</i>   | <i>X</i>    |
| <b>X</b>   |                | <b>1.5-2.4</b>   | <b>3.3</b>      | <b>1.00E-04</b> | <b>P</b>  | <b>238</b>           | <b>79,80</b> | <b>X</b>    | <b>X</b>   |            |             |
| <b>X</b>   |                | <b>2.4-8.7</b>   | <b>9.3</b>      | <b>4.00E-06</b> | <b>N</b>  | <b>-328</b>          | <b>80,81</b> | <b>X</b>    | <b>X</b>   |            | <b>X</b>    |
| <b>X</b>   | <b>5.0</b>     | <b>5.8-7.1</b>   | <b>8</b>        | <b>2.00E-05</b> | <b>N</b>  | <b>-228</b>          | <b>N2,83</b> | <b>X</b>    | <b>X</b>   | <b>X</b>   | <b>X</b>    |
| <i>X</i>   | <i>5.0</i>     | <i>5.8-7.1</i>   |                 | <i>8.00E-04</i> | <i>P</i>  | <i>161</i>           | <i>85,84</i> | <i>X</i>    |            |            |             |
| <b>X</b>   | <b>5.8</b>     | <b>7.1-8</b>     | <b>8.7</b>      | <b>3.00E-08</b> | <b>N</b>  | <b>-306</b>          | <b>N2,85</b> | <b>X</b>    | <b>X</b>   | <b>X</b>   | <b>X</b>    |
| <b>X</b>   | <b>5.8</b>     | <b>7.1-8.7</b>   | <b>9.3</b>      | <b>2.00E-04</b> | <b>N</b>  | <b>-201</b>          | <b>N2,86</b> | <b>X</b>    | <b>X</b>   | <b>X</b>   | <b>X</b>    |
| <i>X</i>   |                | <i>8-8.7</i>     | <i>9.3</i>      | <i>7.00E-04</i> | <i>P</i>  | <i>105</i>           | <i>85,86</i> | <i>X</i>    |            |            |             |
| <b>X</b>   | <b>8.7</b>     | <b>9.3-10.3</b>  | <b>11.1</b>     | <b>9.00E-04</b> | <b>P</b>  | <b>163</b>           | <b>N2,87</b> | <b>X</b>    | <b>X</b>   | <b>X</b>   |             |
| <b>X</b>   | <b>12.9</b>    | <b>13.9-16.4</b> | <b>17.6</b>     | <b>3.00E-07</b> | <b>N</b>  | <b>-278</b>          | <b>N2,89</b> | <b>X</b>    | <b>X</b>   | <b>X</b>   | <b>X</b>    |
| <i>X</i>   |                | <i>16.4-17.6</i> |                 | <i>5.00E-03</i> | <i>P</i>  | <i>120</i>           | <i>89,90</i> |             |            |            |             |

Supplementary table 5: Analysis of dauer larvae formation in the *npr-1* mutants. Three models were used to explain the variation in total dauer number between the *npr-1* mutants, IL ewIR081 and N2. The models used are shown in the first row. The effect and the *p*-values of the individual components are shown in the respective columns.

| Factor          | Dauer~genotype |                  | Dauer~genotype+batch |                  | Dauer~genotype+batch+<br>population size |                  |
|-----------------|----------------|------------------|----------------------|------------------|------------------------------------------|------------------|
|                 | Effect         | <i>p</i> -value  | Effect               | <i>p</i> -value  | Effect                                   | <i>p</i> -value  |
| intercept       | 8822           | <2e-16           | 6956                 | 7e-15            | 2469                                     | 0.194            |
| DA508           | -3227          | <b>5e-5</b>      | -3281                | <b>3e-5</b>      | -3052                                    | <b>7e-5</b>      |
| DA609           | -8181          | <b>&lt;2e-16</b> | -8211                | <b>&lt;2e-16</b> | -7737                                    | <b>&lt;2e-16</b> |
| DA650           | -2412          | <b>2e-3</b>      | -2436                | <b>2e-3</b>      | -2329                                    | <b>2e-3</b>      |
| ewIR081         | -8201          | <b>&lt;2e-16</b> | -7616                | <b>3e-15</b>     | -7478                                    | <b>4e-15</b>     |
| Batch           | NA             | NA               | 921                  | <b>3e-3</b>      | 1613                                     | <b>9e-5</b>      |
| Population size | NA             | NA               | NA                   | NA               | 5996                                     | <b>0.0098</b>    |
